# Supplementary material for: Phenotypic and Genotypic Characterization of Methicillin Resistance in Staphylococci Isolated from an Egyptian University Hospital
Source: MDPI journal article supplement (doi:10.3390/pathogens12040556), 2023-04-05
Supplement: s1 [file s1]

## Supplementary

**Table S1. The sequence of the used primers, product size and PCR protocol of *mecA* and *mecC* genes.**

| SCCmec type | Nucleotide sequence (5'-3')                                  | PCR product Size (bp) | Ref  | PCR protocol                                                                                                                                                                                                                                                                                                   |
|-------------|--------------------------------------------------------------|-----------------------|------|----------------------------------------------------------------------------------------------------------------------------------------------------------------------------------------------------------------------------------------------------------------------------------------------------------------|
| <i>mecA</i> | F: GTAGAAATGACTGAACGTCCGATAA<br>R: CCAATTCCACATTGTTTCGGTCTAA | 310                   | [87] | Initial denaturation: 95°C for 1 min<br>Amplification (30 cycles of):<br>- Denaturation: 95°C for 30 s<br>- Annealing: 50°C for 30 s<br>- Extension: 72°C for 60 s<br>Final extension: 72°C for 4 min<br>The amplified product was identified by electrophoresis on 1.5% agarose gels using 100 bp DNA ladder. |
| <i>mecC</i> | F: GCTCCTAATGCTAATGCA<br>R: TAAGCAATAATGACTACC               | 304                   | [15] | Initial denaturation: 95°C for 2 min<br>Amplification (30 cycles of):<br>- Denaturation: 94°C for 30 s<br>- Annealing: 50°C for 30 s<br>- Extension: 72°C for 30 s<br>Final extension: 72°C for 4 min<br>The amplified product was identified by electrophoresis on 1.5% agarose gels using 100 bp DNA ladder. |

F, forward; R, reverse; bp, base pair; Ref, reference

**Table S2. Different bacterial and fungal isolates distribution in the collected clinical samples**

| Isolated organism             | Number | Sample                        |
|-------------------------------|--------|-------------------------------|
| <b>Gram positive isolates</b> | 210    |                               |
| <i>Staphylococcus aureus</i>  | 118    | Blood- urine-sputum-wound     |
| CoNS                          | 43     | Blood- urine-CSF              |
| <i>Enterococcus</i> spp       | 30     | Blood- urine-wound            |
| <i>Streptococcus</i> spp      | 19     | Sputum-CSF                    |
| <b>Gram negative isolates</b> | 307    |                               |
| <i>E.coli</i>                 | 82     | Blood- urine-wound            |
| <i>Klebsiella</i> spp         | 73     | Blood- urine-sputum-wound-CSF |
| <i>Acinetobacter</i> spp      | 49     | Blood- urine-sputum-wound-CSF |
| <i>Pseudomonas</i> spp        | 87     | Blood- urine-sputum-wound     |
| <i>Enterobacter</i> spp       | 4      | Sputum-wound                  |
| <i>Stenotrophomonas</i> spp   | 12     | Urine-sputum-wound            |
| <b>Fungi</b>                  |        |                               |
| <i>Candida</i> spp            | 36     | Urine-sputum-wound            |
| <b>Total isolates</b>         | 553    |                               |

CoNS: coagulase-negative Staphylococci; CSF, cerebrospinal fluid; spp: species; *E.coli* : *Escherichia coli*
